# Supplementary material
Source: publisher site journal article supplement (https://en-cdn.bio-protocol.org/attached/file/20171106/Supplemental%20material.zip)

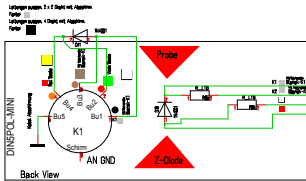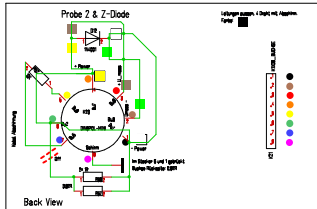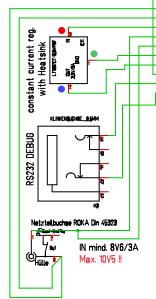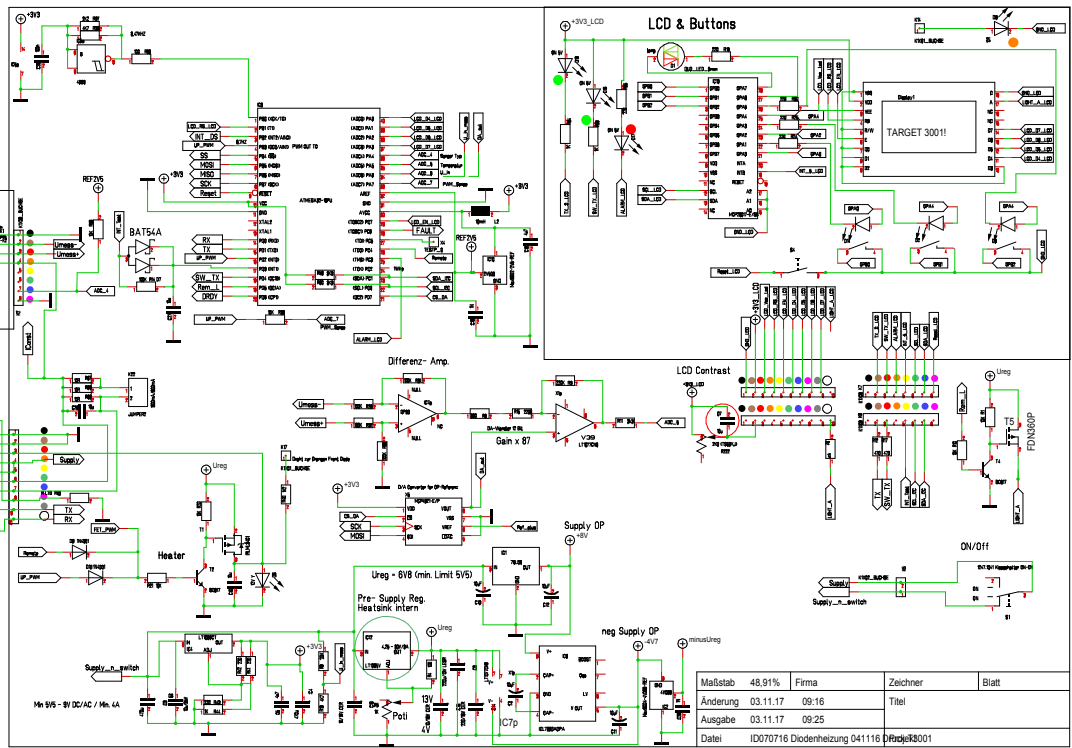

|          |          |                      |          |       |
|----------|----------|----------------------|----------|-------|
| Maßstab  | 48:91%   | Firma                | Zeichner | Blatt |
| Änderung | 03.11.17 | 09:16                | Titel    |       |
| Ausgabe  | 03.11.17 | 09:25                |          |       |
| Dat      | ID070716 | Diodenheizung 041116 |          |       |

Supplement: Supplementary file 1 [file Supplement_ID070716 Diode circuit diagram 041116 Druck_SCH.pdf › Supplement_ID070716 Diode circuit diagram 041116 Druck_SCH.pdf]
